# Supplementary material for: Influence of solution chemical properties and porous medium surface coatings on the transport and retention behavior of polystyrene microplastics
Source: Royal Society of Chemistry journal article supplement (doi:10.1039/d5ra08025h), 2026-05-14
Supplement: d5ra08025h1.pdf [file d5ra08025h1.pdf]

1 **Supplementary Information**

2

3 **Influence of Solution Chemical Properties and Porous**  
4 **Medium Surface Coatings on the Transport and**  
5 **Retention Behavior of Polystyrene Microplastics**

6

7

8

**Abliz Abdurahman <sup>a\*</sup>, Xiaoli Ma <sup>a</sup>, Rui Gao <sup>b</sup>,**

9

10

11 **<sup>a</sup> Chemistry Department, College of Pharmacy, Xinjiang Medical University,**  
12 **Urumqi, 830017, CHINA.**

13 **<sup>b</sup> Institute for Advanced Study, Chengdu University, Chengdu, 610106, CHINA.**

14

15 ***\*Corresponding & Co-first author <sup>a</sup> E- mail: [abliz@xjmu.edu.cn](mailto:abliz@xjmu.edu.cn)***

16 ***Co-first author <sup>a</sup> E- mail: [1065158755@qq.com](mailto:1065158755@qq.com)***

17 ***Co-author <sup>b</sup> E- mail: [gaorui@cdu.edu.cn](mailto:gaorui@cdu.edu.cn)***

18

19

20

21

22

23

24

25

26

27

## 28 **S1. Preparation of HA**

29 HA was used as model NOM compounds in in soils and groundwater  
30 environments. The HA used in this study was extracted from the soil samples (from  
31 Dunhua, Jilin Province, China) according to the method recommended by the  
32 International Humic Substances Society (IHSS). The HA stock solution was stirred  
33 overnight in the dark, and filtered through a 0.22  $\mu\text{m}$  cellulose acetate filter paper (Milli  
34 pore Billerica, MA, USA) and stored at 4  $^{\circ}\text{C}$  for future use. The total organic carbon  
35 content of the HA stock solution was determined through high-temperature oxidation  
36 (TOC-L CPH, SHIMADZU, Japan). And the basic physical and chemical properties of  
37 HA can be found in our previous research paper <sup>1</sup>.

38

## 39 **S2. Electrokinetic Properties of PS – MPs and quartz sand**

40 To better understand the mechanisms governing PS - MPs transport and deposition  
41 in saturated sand, PS - MPs was characterized under the same conditions as those  
42 employed in the column experiments described below. Electrophoretic mobilities were  
43 PS - MPs obtained using microelectrophoresis (Zhongcheng Digital Technology model  
44 JS94G, China) at room temperature, as described ealier<sup>2, 3</sup>, and converted to zeta  
45 potentials using the Smoluchowski equation<sup>4</sup>. Streaming potentials of the iron  
46 oxyhydroxide - coated sand grains were measured<sup>5</sup> using a streaming potential analyzer  
47 (BI-EKA, Brookhaven Instruments Corp., Holtsville, NY) and converted to zeta  
48 potentials using the Helmholtz – Smoluchowski equation<sup>4</sup>.

49

## 50 **S3. Dynamic Light Scattering (DLS) Measurements.**

51 The particle size distribution and dispersion parameters of PS - MPs in different  
52 background solutions were determined by Dynamic Light Scattering (DLS) method. To  
53 analyze the influence of background solutions (such as humic acid concentration, ionic  
54 strength, pH, etc.) on the agglomeration/ dispersion behavior of PS - MPs, and to  
55 provide experimental evidence for understanding the transport and retention behavior  
56 of PS - MPs in porous medium environments.

57 The average PS - MPs aggregate size and the intrinsic size distributions in various

58 suspensions were determined using dynamic light scattering (DLS) (MasterSizer 2000,  
59 Malvern Instruments, UK). The DLS measurements were performed with a multi-  
60 detector light unit which employs a laser with a wavelength of 640 nm. For each  
61 experiment, 3 mL of 40 mg L<sup>-1</sup> PS-MPs suspension was introduced into a glass vial  
62 which had been soaked in cleaning solution, thoroughly rinsed with DI water, and oven-  
63 dried under dust-free conditions. The scattered light intensity was detected by a  
64 photodetector at a scattering angle of 90°, and each auto - correction function was  
65 accumulated for 15 s. The intensity - weighted hydrodynamic particle size distributions  
66 were determined from the intensity - autocorrelation functions using the NNLS  
67 algorithm assuming the Stokes - Einstein equation for spherical particles. The intensity-  
68 weighted particle size distributions were further converted to number-weighted size  
69 distributions. The latter number-weighted sizes were used in the DLVO energy  
70 calculations. All characterization measurements were conducted in duplicate using  
71 freshly prepared suspensions for each condition.

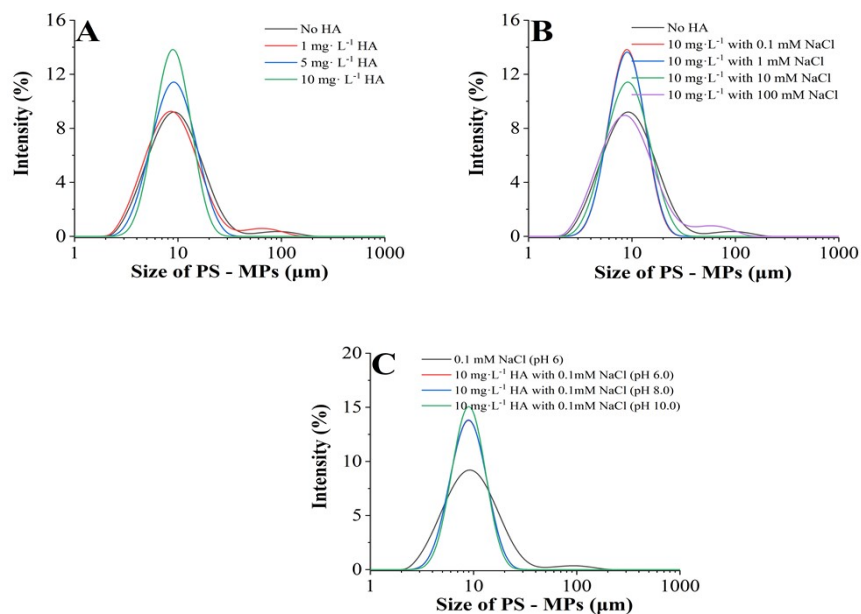

72  
73  
74 **Fig. 1.** Hydrodynamic diameter distribution of PS- MPs under different  
75 experimental conditions  
76  
77

78 **S4. DLVO Theory**

79 Derjaguin - Landau - Verwey - Overbeek (DLVO) theory was used to evaluate the  
 80 interaction energy between PS - MPs and quartz sand. The total interaction energy ( $\Phi$   
 81  $t_{total}$ ) between particles is the sum of van der Waals forces ( $\Phi_{vdw}$ ) and electrostatic  
 82 interactions ( $\Phi_{elec}$ )<sup>6</sup>. The PS - MPs system is considered as a ball - spherical interaction  
 83 system, and the PS - MPs - quartz sand system is considered as a ball - plate interaction  
 84 system to estimate the interaction energy<sup>7</sup>.

85 The electrostatic interactions ( $\Phi_{elec}$ ) and van der Waals ( $\Phi_{vdw}$ ) were calculated for  
 86 PS - MPs and quartz sand system described below equations, respectively.

$$87 \quad \Phi_{elec} = \pi \epsilon_0 \epsilon_r r_p \left\{ 2\psi_p \psi_s \ln \frac{1 + \exp(-kh)}{1 - \exp(-kh)} + (\psi_p^2 + \psi_s^2) \ln[1 - \exp(-2kh)] \right\}$$

88 where  $\epsilon$  is the dielectric constant of water ( $78.5 \text{ C}^2 \cdot \text{N}^{-1} \cdot \text{m}^{-2}$ ),  $\epsilon_0$  is the vacuum dielectric  
 89 constant ( $8.854 \times 10^{-12} \text{ C}^2 \cdot \text{N}^{-1} \cdot \text{m}^{-2}$ ), and  $r_p$  is the average radius PS - MPs.  $\Psi_p$  and  $\Psi_s$  are  
 90 the surface potentials of PS - MPs and quartz sand, and  $h$  is the separation distance [nm]  
 91 between the interfaces.  $k$  is the Debye - Hückel parameter ( $\text{m}^{-1}$ ), the value of which was  
 92 calculated using the following equation:

$$93 \quad k = \sqrt{\frac{e^2 \sum_i n_{j0} z^2}{\epsilon \epsilon_0 k T}}$$

94 where  $e$  is the electron charge ( $1.602 \times 10^{-19} \text{ C}$ ),  $n_{j0}$  is the number concentration of ions  
 95 in solution,  $z$  is the ion valence,  $k$  is Boltzmann's constant ( $1.38 \times 10^{-23} \text{ J} \cdot \text{K}^{-1}$ ), and  $T$  is  
 96 the absolute temperature (298 K).

$$97 \quad \Phi_{vdw} = -\frac{A_{123} r_p}{6h} \left[ 1 + \frac{14h}{\lambda} \right]^{-1}$$

98 where  $\lambda$  is the characteristic wavelength (typically 100 nm), and  $A_{123}$  ( $1.0 \times 10^{-20} \text{ J}$ ) and  
 99  $A_{121}$  ( $1.3 \times 10^{-20} \text{ J}$ ) are Hamaker constants for PS - MPs - water - PS - MPs. The value of  
 100  $A_{123}$  was calculated using the following equation:

$$101 \quad A_{123} = (\sqrt{A_{11}} - \sqrt{A_{22}})(\sqrt{A_{33}} - \sqrt{A_{22}})$$

102 where  $A_{11}$ ,  $A_{22}$ , and  $A_{33}$  are the Hamaker constants of PS - MPs, water, and quartz sand,  
 103 respectively, and  $A_{11} = 7.9 \times 10^{-20} \text{ J}$ ,  $A_{22} = 4.0 \times 10^{-20} \text{ J}$ , and  $A_{33} = 6.0 \times 10^{-20} \text{ J}$ .

104 Eventually, equations were used to calculate the electrostatic ( $\Phi_{elec}$ ) and Van der Waals  
 105 ( $\Phi_{vdw}$ ) interaction energies.

$$106 \quad \Phi_{elec} = 2\pi\epsilon_0\epsilon r_p \psi_p^2 \ln[1 + \exp(-kh)]$$

$$107 \quad \Phi_{vdw} = -\frac{A_{121}r_p}{12h} \left[1 + \frac{14h}{\lambda}\right]^{-1}$$

$$108 \quad A_{121} = (\sqrt{A_{11}} - \sqrt{A_{22}})^2$$

109

### 110 **S5. Calculation of Single Collector Contact Efficiency (SCCE) $\eta_0$**

111 Single Collector Contact Efficiency (SCCE), usually denoted as  $\eta_0$ , is a key  
 112 parameter in the colloid filtration theory (Colloid Filtration Theory, CFT), and which  
 113 one is used to describe the efficiency of physical collisions between suspended particles  
 114 (such as MPs) and individual collector particles (i.e., "collectors") in porous media. The  
 115 purpose of calculating  $\eta_0$  is to quantify the collision probability of particles without the  
 116 influence of surface interaction forces, which is the basis for further calculating the  
 117 attachment efficiency  $\alpha^8$ . Its calculation formula is as follows:

$$118 \quad \eta_0 = A_s^{1/3} N_R^{-0.081} N_{Pe}^{-0.715} N_{Vdw}^{0.052} + 0.55N_R^{1.675} N_A^{0.125} + 0.22N_R^{-0.24} N_G^{1.11} + N_{Vdw}^{0.053}$$

119 Where  $A_s$  is the porosity constant;  $N_R$  is the aspect ratio;  $N_{Pe}$  is the Pickrel  
 120 constant;  $N_{vdw}$  is the van der Waals constant;  $N_a$  is the attraction constant;  $N_G$  is the  
 121 gravitational constant. All parameters are dimensionless and calculated using the  
 122 following series of formulas<sup>9, 10</sup>:

$$123 \quad A_s = \frac{1 - \epsilon^5}{1 - 1.5\epsilon + 1.5\epsilon^5 - \epsilon^6}$$

$$124 \quad \epsilon = (1 - \theta)^{\frac{1}{3}}$$

$$125 \quad N_R = \frac{d_p}{d_c}$$

$$126 \quad N_{pe} = \frac{vd_c}{D_\infty}$$

$$127 \quad N_{vdw} = \frac{A}{kT}$$

128

129

130

$$N_A = \frac{A}{12\pi a_p^2 v \eta}$$
$$N_G = \frac{2a_p^2(\rho_p - \rho_r)g}{9v\eta}$$

131 where  $\varepsilon$  is a parameter related to porosity,  $d_p$  is the diameter of PS - MPs (10  $\mu\text{m}$ );  $v$  is

132 the pore water flow velocity ( $\text{m}\cdot\text{s}^{-1}$ );  $D_\infty$  is the solution volume coefficient ( $\text{m}^2\cdot\text{s}^{-1}$ );  $\eta$  is

133 the solution viscosity ( $8.9 \times 10^{-4} \text{ kg}\cdot\text{m}^{-1}\cdot\text{s}^{-1}$ );  $\rho_p$  is the density of PS - MPs ( $1.05 \times 10^3$

134  $\text{kg}\cdot\text{m}^{-3}$ );  $\rho_r$  is the solution density ( $1.0 \times 10^3 \text{ kg}\cdot\text{m}^{-3}$ );  $g$  is the gravitational acceleration

135 constant ( $9.8 \text{ m}\cdot\text{s}^{-2}$ )<sup>11</sup>.

136

### 137 References

138 1. R. Gao, H. Wang, A. Abdurahman, W. Q. Liang, X. T. Lu, S. Y. Wei and F. Zeng, *J. RSC Adv.*,  
139 2022, **12**, 22416-22424.

140 2. D. J. Wang, L. Y. Chu, M. Paradelo, W. J. G. M. Peijnenburg, Y. J. Wang and D. M. Zhou, *J.*  
141 *Colloid Inter. Sci.*, 2011, **360**, 398-407.

142 3. D. M. Zhou, D. J. Wang, L. Cang, X. Z. Hao and L. Y. Chu, *J. Soil Sediment*, 2011, **11**, 491-503.

143 4. J. K. Walters, *Chem. Eng J. & Biochem. Eng. J.*, 1996, **64**, 363-363.

144 5. P. R. Johnson, *J. Colloid Interface Sci.*, 1999, **209**, 264-267.

145 6. Y. Wang, L. Xu, H. Chen and M. Zhang, *Environ Sci Technol.*, 2022, **808**, 152154.

146 7. Q. Ma, Y. Sun, S. Zhou, X. Yin and H. Sun, *Environ Manag*, 2025, **377**, 124696.

147 8. F. Li, Danlian Huang, G. Wang, M. Cheng, H. Chen, W. Zhou, R. Xiao, R. Li, L. Du and W. Xu,  
148 *Sci Total Environ.*, 2024, **926**, 171658.

149 9. B. Logan, D. Jewett, R. Arnold, E. Bouwer and C. O'Melia, *J. Environ. Eng.*, 1995, **121**, 869-  
150 873.

151 10. N. Tufenkji and M. Elimelech, *Environ Sci Technol.*, 2005, **38**, 529.

152 11. D. Wang, L. Chu, M. Paradelo, W. J. G. M. Peijnenburg, Yujun Wang and D. Zhou, *Colloid*  
153 *Interface Sci*, 2011, **360**, 398-407.

154
